# Supplementary material
Source: PubMed Central journal article supplement (PMC5155336)
Supplement: NIHMS834608-supplement-Technical_Appendix.pdf [file NIHMS834608-supplement-Technical_Appendix.pdf]

**Technical Appendix:**

Below is additional information regarding our regression analysis, including the regression equation, number of observations, independent and dependent variables, standard errors, t-statistics, the R-squared value, and the F-statistic.

The dependent variable in this study was the rate of opioid pain reliever-related deaths per 100,000 population.

The regression was run in Stata 13.1 using the xtreg command with state fixed effects.

TECHNICAL APPENDIX EXHIBIT 1  
Additional information regarding regression analysis

| <b>Independent Variable</b>                | <b>Coefficient</b> | <b>Standard Error</b> | <b>t</b> |
|--------------------------------------------|--------------------|-----------------------|----------|
| PDMP Implementation Status                 | -1.12              | 0.29                  | -3.90    |
| PDMP Legislative Enactment Status          | 0.17               | 0.29                  | 0.57     |
| State-level unemployment rate              | -0.08              | 0.06                  | -1.38    |
| State-level educational attainment rate    | -0.08              | 0.16                  | -0.51    |
| Number of years since PDMP was implemented | 0.11               | 0.06                  | 1.92     |
| Year in study period                       | 0.45               | 0.07                  | 6.51     |

|                                                                                                                                              |
|----------------------------------------------------------------------------------------------------------------------------------------------|
| <p>N = 510<br/> F = &lt;0.001<br/> R<sup>2</sup> (within) = 0.53<br/> R<sup>2</sup> (between) = 0.02<br/> R<sup>2</sup> (overall) = 0.27</p> |
|----------------------------------------------------------------------------------------------------------------------------------------------|

**Supplemental Appendix:**

APPENDIX EXHIBIT 1

Multivariable associations of Prescription Drug Monitoring Programs and opioid-related deaths in the US without imputed data, 1999–2013

N=499

|                                                                                                                                                                                                                                                                                                                                                                                                                                                                                                                                                                                                                                                                                                                                                                                                                                                                    | <b>Variable</b>            | <b>Bivariate</b><br>Coefficient (95% CI) | <b>P-Value</b> | <b>Multivariable</b><br>Coefficient (95% CI) | <b>P-Value</b> |
|--------------------------------------------------------------------------------------------------------------------------------------------------------------------------------------------------------------------------------------------------------------------------------------------------------------------------------------------------------------------------------------------------------------------------------------------------------------------------------------------------------------------------------------------------------------------------------------------------------------------------------------------------------------------------------------------------------------------------------------------------------------------------------------------------------------------------------------------------------------------|----------------------------|------------------------------------------|----------------|----------------------------------------------|----------------|
| <b>Explanatory Variables</b>                                                                                                                                                                                                                                                                                                                                                                                                                                                                                                                                                                                                                                                                                                                                                                                                                                       | PDMP Implementation        | 2.01 (1.65 to 2.37)                      | <0.001         | -1.09 (-1.65 to -0.55)                       | <0.001         |
|                                                                                                                                                                                                                                                                                                                                                                                                                                                                                                                                                                                                                                                                                                                                                                                                                                                                    | PDMP Implementation*Time   | 0.43 (0.33 to 0.52)                      | <0.001         | 0.12 (0.00 to 0.28)                          | 0.05           |
| <b>State-Level &amp; Time Trend Controls</b>                                                                                                                                                                                                                                                                                                                                                                                                                                                                                                                                                                                                                                                                                                                                                                                                                       | PDMP legislation enactment | 2.37 (2.07 to 2.66)                      | <0.001         | 0.15 (-0.42 to 0.73)                         | 0.61           |
|                                                                                                                                                                                                                                                                                                                                                                                                                                                                                                                                                                                                                                                                                                                                                                                                                                                                    | Educational Attainment     | 0.98 (0.90 to 1.05)                      | <0.001         | -0.01 (-0.33 to 0.32)                        | 0.97           |
|                                                                                                                                                                                                                                                                                                                                                                                                                                                                                                                                                                                                                                                                                                                                                                                                                                                                    | Unemployment Rate          | 0.56 (0.48 to 0.64)                      | <0.001         | -0.7 (-0.18 to 0.04)                         | 0.21           |
|                                                                                                                                                                                                                                                                                                                                                                                                                                                                                                                                                                                                                                                                                                                                                                                                                                                                    | Linear time trend          | 0.33 (0.31 to 0.36)                      | <0.001         | 0.42 (0.28 to 0.56)                          | <0.001         |
| <p>Source/Notes: Authors' analyses of data from National Center for Health Statistics, National Vital Statistics System, Detailed Mortality File accessed through CDC WONDER Database; American Community Census 5-year estimates; Decennial census, 2000 and 2010; Bureau of Labor Statistics; Brandeis University PDMP Training Technical Assistance Center (TTAC); Law Atlas, Prescription Monitoring Program Dataset; Montana Children, Families, Health, and Human Services Interim Committee; Personal communication with state PDMP administrators.</p> <p>Note: For each bivariate and multivariate regression, the outcome of interest is the opioid-related overdose death rate / 100,000 population. The explanatory variables, as well as the PDMP legislation enactment, are per year of implementation. State fixed effects used for all models.</p> |                            |                                          |                |                                              |                |

APPENDIX EXHIBIT 2

Associations between PDMP Implementation, Control Structures and Opioid-related Deaths, 1999-2013

- A. All states included in analysis
- B. West Virginia is excluded from analysis
- C. Florida is excluded from analysis

|                                              | Variable               | Model A<br>Coefficient<br>(95% CI) | P-Value | Model B<br>Coefficient<br>(95% CI) | P-Value | Model C<br>Coefficient<br>(95% CI) | P-Value |
|----------------------------------------------|------------------------|------------------------------------|---------|------------------------------------|---------|------------------------------------|---------|
| <b>Explanatory Variables</b>                 | PDMP Implementation    | -1.12<br>(-1.68 to -0.55)          | <0.001  | -0.70<br>(-1.10 to -0.31)          | 0.001   | -1.05<br>(-1.63 to -0.48)          | <0.001  |
|                                              | PDMP*Time Interaction  | 0.11<br>(0.00 to 0.23)             | 0.06    | -0.16<br>(-0.25 to -0.08)          | <0.001  | 0.12<br>(0.00 to 0.23)             | 0.05    |
| <b>State-Level &amp; Time Trend Controls</b> | Educational Attainment | -0.08<br>(-0.40 to 0.24)           | 0.61    | -0.02<br>(-0.24 to 0.20)           | 0.86    | -0.11<br>(-0.43 to 0.21)           | 0.51    |
|                                              | Unemployment Rate      | -0.08<br>(-0.19 to 0.03)           | 0.17    | 0.00<br>(-0.08 to 0.08)            | 0.99    | -0.09<br>(-0.21 to 0.02)           | 0.12    |
|                                              | Legislative Enactment  | 0.17<br>(-0.40 to 0.74)            | 0.57    | -0.03<br>(-0.43 to 0.37)           | 0.89    | 0.15<br>(-0.43 to 0.73)            | 0.62    |
|                                              | Linear Time Trend      | 0.45<br>(0.31 to 0.59)             | <0.001  | 0.43<br>(0.33 to 0.52)             | <0.001  | 0.46<br>(0.32 to 0.60)             | <0.001  |
| <b>Regression Output</b>                     | N                      | 510                                | --      | 495                                | --      | 495                                | --      |
|                                              | R <sup>2</sup> overall | 0.27                               | --      | 0.33                               | --      | 0.27                               | --      |
|                                              | F-statistic            | <0.001                             | --      | <0.001                             | --      | <0.001                             | --      |

Source: Authors' analyses of data from National Center for Health Statistics, National Vital Statistics System, Detailed Mortality File accessed through CDC WONDER Database; American Community Census 5-year estimates; Decennial census, 2000 and 2010; Bureau of Labor Statistics; Brandeis University PDMP Training Technical Assistance Center (TTAC); Law Atlas, Prescription Monitoring Program Dataset; Montana Children, Families, Health, and Human Services Interim Committee; Personal communication with state PDMP administrators

APPENDIX EXHIBIT 3

Associations between PDMP Implementation and Opioid-Related Deaths, 1999-2013

- A. Analysis does not include deaths attributed to heroin or opium
- B. Analysis does include deaths attributed to heroin or opium

|                                              | <b>Variable</b>        | <b>Model A</b><br>Coefficient<br>(95% CI) | P-Value | <b>Model B</b><br>Coefficient<br>(95% CI) | P-Value |
|----------------------------------------------|------------------------|-------------------------------------------|---------|-------------------------------------------|---------|
| <b>Explanatory Variables</b>                 | PDMP Implementation    | -1.12<br>(-1.68 to -0.55)                 | <0.001  | -1.19<br>(-1.80 to -0.58)                 | 0.001   |
|                                              | PDMP*Time Interaction  | 0.11<br>(0.00 to 0.23)                    | 0.06    | 0.18<br>(0.05 to 0.30)                    | 0.006   |
| <b>State-Level &amp; Time Trend Controls</b> | Educational Attainment | -0.08<br>(-0.40 to 0.24)                  | 0.61    | -0.24<br>(-0.59 to 0.10)                  | 0.17    |
|                                              | Unemployment Rate      | -0.08<br>(-0.19 to 0.03)                  | 0.17    | -0.12<br>(-0.24 to 0.00)                  | 0.05    |
|                                              | Legislative Enactment  | 0.17<br>(-0.40 to 0.74)                   | 0.57    | 0.06<br>(-0.56 to 0.67)                   | 0.86    |
|                                              | Linear Time Trend      | 0.45<br>(0.31 to 0.59)                    | <0.001  | 0.59<br>(0.45 to 0.74)                    | <0.001  |
| <b>Regression Output</b>                     | N                      | 510                                       | --      | 510                                       | --      |
|                                              | R <sup>2</sup> overall | 0.27                                      | --      | 0.26                                      | --      |
|                                              | F-statistic            | <0.001                                    | --      | <0.001                                    | --      |

Source: Authors' analyses of data from National Center for Health Statistics, National Vital Statistics System, Detailed Mortality File accessed through CDC WONDER Database; American Community Census 5-year estimates; Decennial census, 2000 and 2010; Bureau of Labor Statistics; Brandeis University PDMP Training Technical Assistance Center (TTAC); Law Atlas, Prescription Monitoring Program Dataset; Montana Children, Families, Health, and Human Services Interim Committee; Personal communication with state PDMP administrators.

Note: For each bivariate and multivariate regression, the outcome of interest is the opioid-related overdose death rate / 100,000 population. The explanatory variables, as well as the PDMP legislation enactment, are per year of implementation. State fixed effects used for all models.



APPENDIX EXHIBIT 5. Prescription Opioid-Related Death Rate, A. 1999, B. 2007, C. 2013.

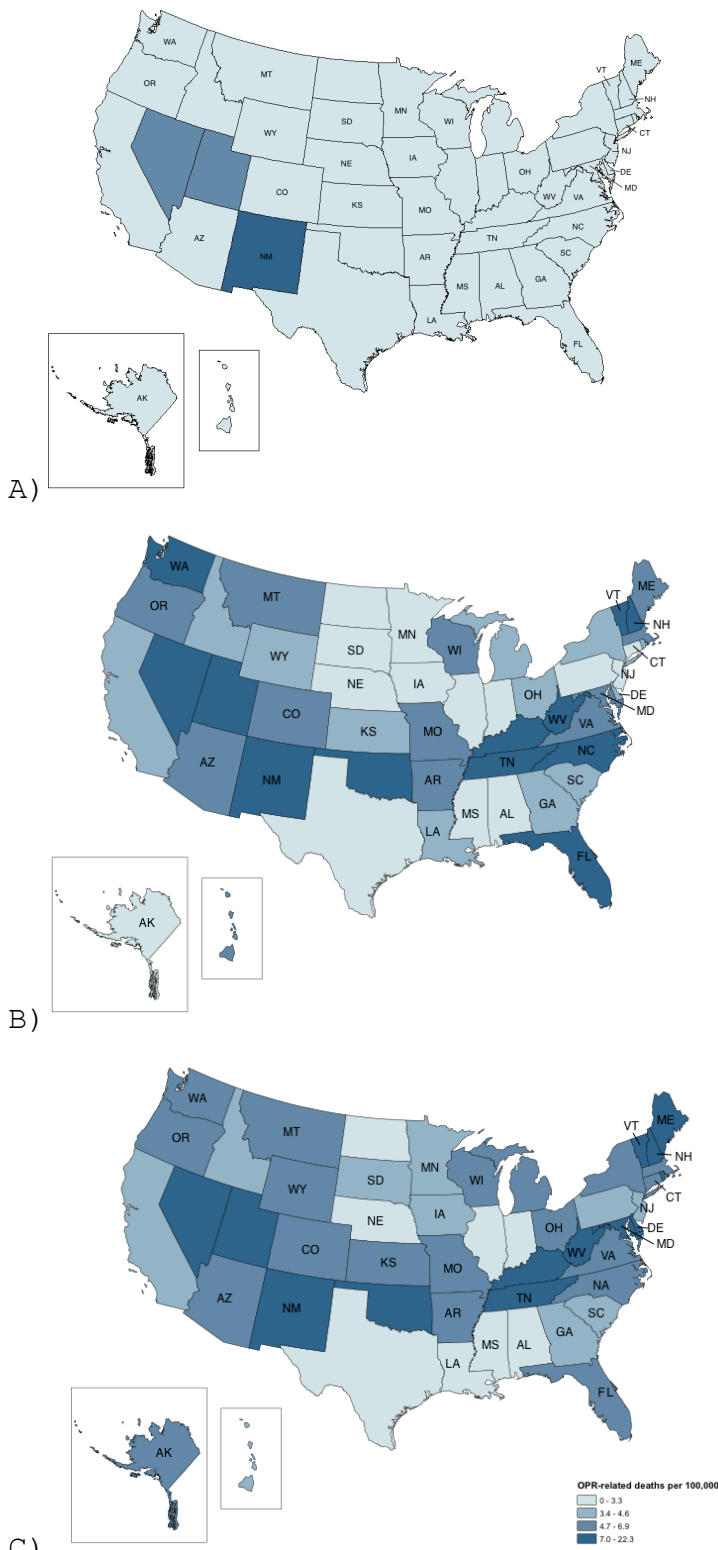

Source/Notes: Brandeis University PDMP Training Technical Assistance Center (TTAC); States labeled with their postal abbreviations are included in our study sample.

APPENDIX EXHIBIT 6

Characteristics of US states with and without an implemented Prescription Drug Monitoring Program, 1999-2013

|             |                                          | With Implemented PDMP<br>Value (95% CI) | Without Implemented PDMP<br>Value (95% CI) | P-Value* | Overall<br>Mean |
|-------------|------------------------------------------|-----------------------------------------|--------------------------------------------|----------|-----------------|
| <b>1999</b> | Number of States                         | --                                      | 34                                         | --       | 34              |
|             | Opioid-Related Overdose Deaths / 100,000 | --                                      | 1.36 (0.91 to 2.73)                        | --       | 1.36            |
|             | Unemployment Rate                        | --                                      | 3.99 (3.61 to 4.36)                        | --       | 3.9             |
|             | Educational Attainment**                 | --                                      | 23.24 (21.72 to 24.75)                     | --       | 23.2            |
| <b>2000</b> | Number of States                         | --                                      | 34                                         | --       | 34              |
|             | Opioid-Related Overdose Deaths / 100,000 | --                                      | 1.71 (1.27 to 2.16)                        | --       | 1.71            |
|             | Unemployment Rate                        | --                                      | 3.81 (3.46 to 4.16)                        | --       | 3.81            |
|             | Educational Attainment**                 | --                                      | 23.87 (22.32 to 25.41)                     | --       | 23.87           |
| <b>2001</b> | Number of States                         | --                                      | 34                                         | --       | 34              |
|             | Opioid-Related Overdose Deaths / 100,000 | --                                      | 2.32 (1.81 to 2.82)                        | --       | 2.32            |
|             | Unemployment Rate                        | --                                      | 4.41 (4.08 to 4.73)                        | --       | 4.41            |
|             | Educational Attainment**                 | --                                      | 24.51 (22.93 to 26.08)                     | --       | 24.51           |
| <b>2002</b> | Number of States                         | 1                                       | 33                                         | --       | 34              |
|             | Opioid-Related Overdose Deaths / 100,000 | 9.4 (--)                                | 2.82 (2.23 to 3.42)                        | --       | 3.02            |
|             | Unemployment Rate                        | 5.9 (--)                                | 5.22 (4.83 to 5.60)                        | --       | 5.24            |
|             | Educational Attainment**                 | 15.8 (--)                               | 25.47 (23.91 to 27.03)                     | --       | 25.19           |
| <b>2003</b> | Number of States                         | 2                                       | 32                                         | --       | 34              |
|             | Opioid-Related Overdose Deaths / 100,000 | 7.05 (-36.79 to 50.89)                  | 3.25 (2.52 to 3.98)                        | 0.02     | 3.47            |
|             | Unemployment Rate                        | 5.05 (-7.02 to 17.12)                   | 5.51 (5.12 to 5.90)                        | 0.56     | 5.49            |
|             | Educational Attainment**                 | 23.65 (-74.82 to 122.12)                | 25.29 (23.73 to 26.85)                     | 0.63     | 25.19           |
| <b>2004</b> | Number of States                         | 3                                       | 31                                         | --       | 34              |
|             | Opioid-Related Overdose Deaths / 100,000 | 8.03 (-3.58 to 19.64)                   | 3.56 (2.93 to 4.19)                        | <0.001   | 3.96            |
|             | Unemployment Rate                        | 4.53 (2.54 to 6.53)                     | 5.14 (4.76 to 5.51)                        | 0.34     | 5.08            |
|             | Educational Attainment**                 | 25.97 (24.32 to 27.62)                  | 24.57 (4.80 to 44.34)                      | 0.63     | 25.84           |
| <b>2005</b> | Number of States                         | 6                                       | 28                                         | --       | 34              |
|             | Opioid-Related Overdose Deaths / 100,000 | 5.17 (1.89 to 8.44)                     | 3.91 (3.28 to 4.89)                        | .016     | 4.14            |
|             | Unemployment Rate                        | 5.0 (3.39 to 6.61)                      | 4.86 (4.47 to 5.26)                        | 0.79     | 4.89            |
|             | Educational Attainment**                 | 23.78 (17.71 to 29.85)                  | 27.08 (25.32 to 28.84)                     | 0.13     | 26.5            |
| <b>2006</b> | Number of States                         | 8                                       | 26                                         | --       | 34              |
|             | Opioid-Related Overdose Deaths / 100,000 | 6.0 (2.04 to 9.96)                      | 4.82 (4.03 to 5.61)                        | 0.31     | 5.1             |
|             | Unemployment Rate                        | 4.4 (3.34 to 5.46)                      | 4.35 (3.98 to 4.72)                        | 0.91     | 4.36            |
|             | Educational Attainment**                 | 23.24 (19.11 to 27.36)                  | 27.28 (25.5 to 29.06)                      | 0.03     | 26.33           |
| <b>2007</b> | Number of States                         | 11                                      | 23                                         | --       | 34              |
|             | Opioid-Related Overdose Deaths / 100,000 | 6.88 (4.03 to 9.73)                     | 4.75 (3.89 to 5.61)                        | 0.05     | 5.44            |
|             | Unemployment Rate                        | 4.27 (3.54 to 5.00)                     | 4.69 (3.68 to 5.69)                        | 0.58     | 4.55            |
|             | Educational Attainment**                 | 24.36 (20.75 to 27.98)                  | 27.24 (25.39 to 29.10)                     | 0.10     | 26.31           |

\*\* Percent aged 25 years and older with a college degree or higher

Patrick SW, Fry CE, Jones TF, Buntin MB. Implementation of prescription drug monitoring programs associated with reductions in opioid-related deaths. Health Aff (Millwood). 2016;35(7). Published online June 22, 2016.

|             |                                          | <b>With Implemented PDMP<br/>Value (95% CI)</b> | <b>Without Implemented PDMP<br/>Value (95% CI)</b> | <b>P-Value*</b> | <b>Overall<br/>Mean</b> |
|-------------|------------------------------------------|-------------------------------------------------|----------------------------------------------------|-----------------|-------------------------|
| <b>2008</b> | Number of States                         | 15                                              | 19                                                 | --              | 34                      |
|             | Opioid-Related Overdose Deaths / 100,000 | 6.47 (4.14 to 8.8)                              | 5.46 (4.29 to 6.64)                                | 5.91            | 0.39                    |
|             | Unemployment Rate                        | 5.41 (4.76 to 6.06)                             | 4.98 (4.48 to 5.49)                                | 5.17            | 0.28                    |
|             | Educational Attainment**                 | 25.01 (22.0 to 28.02)                           | 27.98 (26.05 to 29.91)                             | 0.08            | 26.67                   |
| <b>2009</b> | Number of States                         | 17                                              | 17                                                 | --              | 34                      |
|             | Opioid-Related Overdose Deaths / 100,000 | 5.35 (4.28 to 6.42)                             | 6.14 (4.94 to 7.34)                                | 0.31            | 5.75                    |
|             | Unemployment Rate                        | 8.45 (7.58 to 9.31)                             | 7.96 (7.04 to 8.88)                                | 0.42            | 8.20                    |
|             | Educational Attainment**                 | 25.81 (22.97 to 28.65)                          | 28.15 (26.10 to 30.19)                             | 0.17            | 26.98                   |
| <b>2010</b> | Number of States                         | 18                                              | 16                                                 | --              | 34                      |
|             | Opioid-Related Overdose Deaths / 100,000 | 6.38 (4.08 to 8.68)                             | 5.93 (4.89 to 6.96)                                | 0.72            | 6.16                    |
|             | Unemployment Rate                        | 8.7 (7.93 to 9.47)                              | 8.2 (7.17 to 9.23)                                 | 0.41            | 8.46                    |
|             | Educational Attainment**                 | 26.24 (23.5 to 28.98)                           | 28.17 (26.02 to 30.32)                             | 0.26            | 27.15                   |
| <b>2011</b> | Number of States                         | 22                                              | 12                                                 | --              | 34                      |
|             | Opioid-Related Overdose Deaths / 100,000 | 6.41 (4.07 to 8.75)                             | 6.25 (5.09 to 7.41)                                | 0.92            | 6.36                    |
|             | Unemployment Rate                        | 7.85 (7.0 to 8.71)                              | 7.62 (6.64 to 8.59)                                | 0.71            | 7.77                    |
|             | Educational Attainment**                 | 26.87 (24.61 to 29.13)                          | 28.61 (25.67 to 31.54)                             | 0.33            | 27.48                   |
| <b>2012</b> | Number of States                         | 28                                              | 6                                                  | --              | 34                      |
|             | Opioid-Related Overdose Deaths / 100,000 | 5.69 (4.42 to 7.51)                             | 5.68 (4.59 to 6.78)                                | 0.87            | 5.91                    |
|             | Unemployment Rate                        | 7.09 (6.49 to 7.69)                             | 7.13 (5.94 to 8.32)                                | 0.95            | 7.1                     |
|             | Educational Attainment**                 | 6.58 (6.09 to 7.06)                             | 5.9 (-1.72 to 13.52)                               | 0.49            | 6.54                    |
| <b>2013</b> | Number of States                         | 32                                              | 2                                                  | --              | 34                      |
|             | Opioid-Related Overdose Deaths / 100,000 | 6.19 (4.88 to 7.50)                             | 6.50 (-1.12 to 14.12)                              | 0.91            | 6.21                    |
|             | Unemployment Rate                        | 6.58 (6.09 to 7.06)                             | 5.90 (-1.72 to 13.52)                              | 0.49            | 6.54                    |
|             | Educational Attainment**                 | 28.03 (26.21 to 29.84)                          | 29.95 (-17.70 to 77.60)                            | 0.60            | 28.14                   |

\*\* Percent aged 25 years and older with a college degree or higher

Sources: National Center for Health Statistics, National Vital Statistics System, Detailed Mortality File accessed through CDC WONDER Database; American Community Census 5-year estimates; Decennial census, 2000 and 2010; Bureau of Labor Statistics; Brandeis University PDMP Training Technical Assistance Center (TTAC); Law Atlas, Prescription Monitoring Program Dataset



APPENDIX EXHIBIT 7

Frequency of PDMP Control Structures for States in Sample, Selected Years.

| <b>Control Structure</b>                                                                                                                                                                                                                                                                                                                                                                                                                                                                                                       | <b>2005</b> | <b>2007</b> | <b>2009</b> | <b>2011</b> | <b>2013</b> |
|--------------------------------------------------------------------------------------------------------------------------------------------------------------------------------------------------------------------------------------------------------------------------------------------------------------------------------------------------------------------------------------------------------------------------------------------------------------------------------------------------------------------------------|-------------|-------------|-------------|-------------|-------------|
| Number of drugs schedules monitored                                                                                                                                                                                                                                                                                                                                                                                                                                                                                            |             |             |             |             |             |
| One                                                                                                                                                                                                                                                                                                                                                                                                                                                                                                                            | 0           | 0           | 0           | 0           | 0           |
| Two                                                                                                                                                                                                                                                                                                                                                                                                                                                                                                                            | 0           | 0           | 0           | 0           | 1           |
| Three                                                                                                                                                                                                                                                                                                                                                                                                                                                                                                                          | 4           | 5           | 9           | 12          | 14          |
| Four                                                                                                                                                                                                                                                                                                                                                                                                                                                                                                                           | 1           | 4           | 5           | 7           | 13          |
| Five                                                                                                                                                                                                                                                                                                                                                                                                                                                                                                                           | 0           | 1           | 2           | 2           | 3           |
| Frequency information updated in PDMP                                                                                                                                                                                                                                                                                                                                                                                                                                                                                          |             |             |             |             |             |
| Less often than weekly                                                                                                                                                                                                                                                                                                                                                                                                                                                                                                         | 4           | 7           | 11          | 4           | 4           |
| Weekly                                                                                                                                                                                                                                                                                                                                                                                                                                                                                                                         | 0           | 1           | 4           | 15          | 22          |
| More often than weekly                                                                                                                                                                                                                                                                                                                                                                                                                                                                                                         | 0           | 0           | 0           | 1           | 5           |
| Not specified in statute                                                                                                                                                                                                                                                                                                                                                                                                                                                                                                       | 1           | 2           | 1           | 1           | 0           |
| Prescribers must either register or use PDMP in certain situations                                                                                                                                                                                                                                                                                                                                                                                                                                                             | 0           | 1           | 2           | 3           | 11          |
| Total number of PDMPs implemented                                                                                                                                                                                                                                                                                                                                                                                                                                                                                              | 5           | 10          | 16          | 21          | 31          |
| Source/Notes: Authors' analyses of data from Brandeis University PDMP Training Technical Assistance Center (TTAC); Law Atlas Prescription Monitoring Program Database; Montana Children, Families, Health, and Human Services Interim Committee<br>Note: When the frequency of updating to a PDMP was not specified in the statute, it was included in the reference category for our bivariate and multivariable models. Because we did not include West Virginia in regression model 2, we have also omitted the state here. |             |             |             |             |             |

APPENDIX EXHIBIT 8

Association between the number of drug schedules monitored by a PDMP and opioid-related deaths, 1999-2013

N = 495

|                                              | <b>Variable</b>                    | <b>Model Coefficient (95% CI)</b> | <b>P-Value</b> |
|----------------------------------------------|------------------------------------|-----------------------------------|----------------|
| <b>Explanatory Variables</b>                 | PDMP Implementation                | 0.05 (-1.65 to 1.74)              | 0.96           |
|                                              | PDMP*Time Interaction              | -0.16 (-0.24 to -0.07)            | <0.001         |
|                                              | Number of Drug Schedules Monitored | --                                | --             |
|                                              | Two                                | -0.57 (-3.39 to 2.24)             | 0.67           |
|                                              | Three                              | -0.55 (-2.25 to 1.14)             | 0.52           |
|                                              | Four                               | -1.04 (-2.79 to 0.71)             | 0.24           |
|                                              | Five                               | -1.09 (-2.96 to 0.77)             | 0.25           |
| <b>State-Level &amp; Time Trend Controls</b> | Educational Attainment             | -0.05 (-0.28 to 0.17)             | 0.63           |
|                                              | Unemployment Rate                  | 0.00 (-0.08 to 0.08)              | 0.99           |
|                                              | Legislative Enactment              | -0.03 (-0.43 to 0.36)             | 0.87           |
|                                              | Linear Time Trend                  | 0.44 (0.35 to 0.54)               | <0.001         |
| <b>Regression Output</b>                     | R <sup>2</sup> overall             | 0.34                              | --             |
|                                              | F-statistic                        | <0.001                            | --             |

Source: Authors' analyses of data from National Center for Health Statistics, National Vital Statistics System, Detailed Mortality File accessed through CDC WONDER Database; American Community Census 5-year estimates; Decennial census, 2000 and 2010; Bureau of Labor Statistics; Brandeis University PDMP Training Technical Assistance Center (TTAC); LawAtlas, Prescription Monitoring Program Dataset; Montana Children, Families, Health, and Human Services Interim Committee; Personal communication with state PDMP administrators. Note: For each bivariate and multivariate regression, the outcome of interest is the opioid-related overdose death rate / 100,000 population. The explanatory variables, as well as the PDMP legislation enactment, are per year of implementation. State fixed effects used for all models.
